# Supplementary material
Source: PubMed Central journal article supplement (PMC4607068)

Supplemental Figure 1

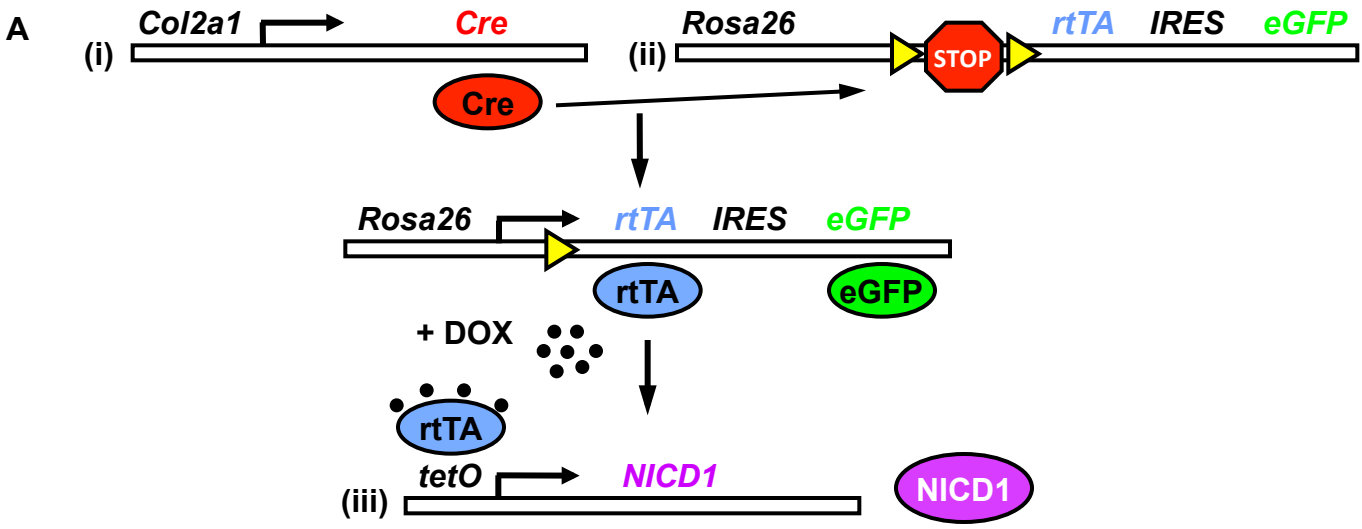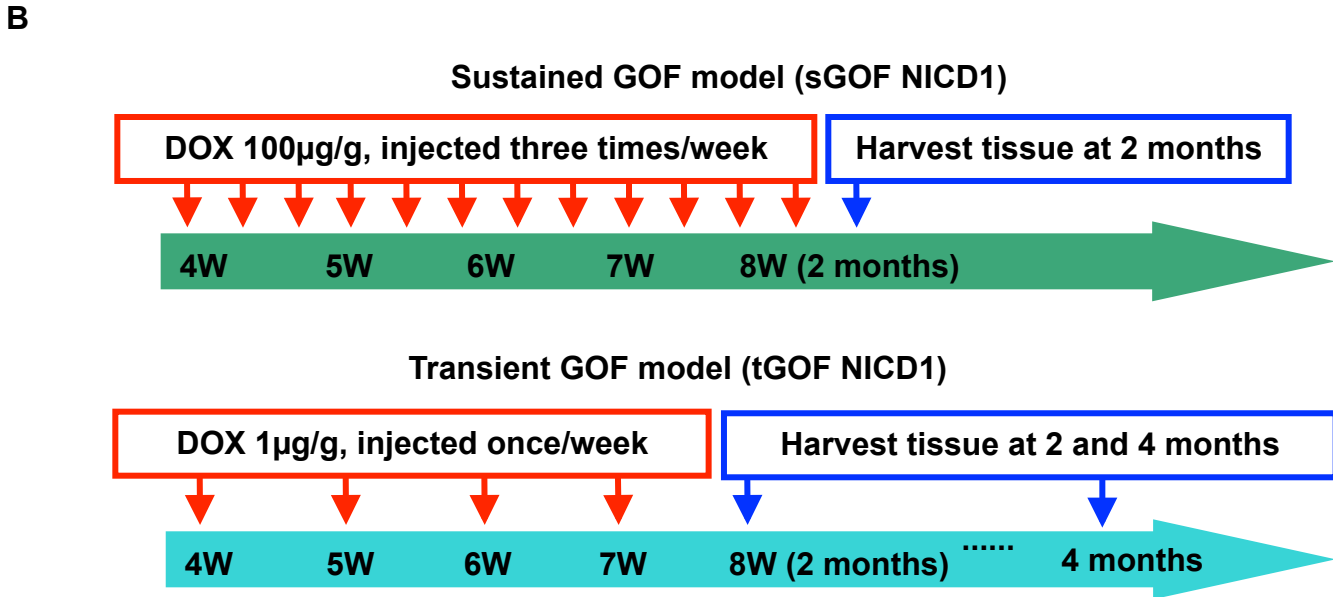

Supplement: NIHMS728654-supplement-Fig_S1.pdf [file NIHMS728654-supplement-Fig_S1.pdf]

Supplemental Figure 2

A

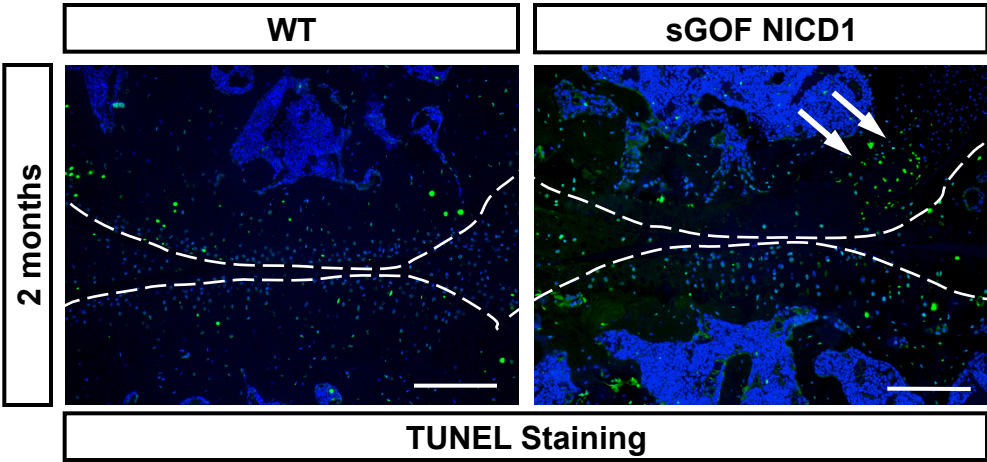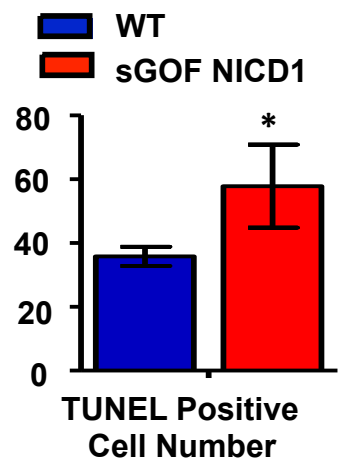

B

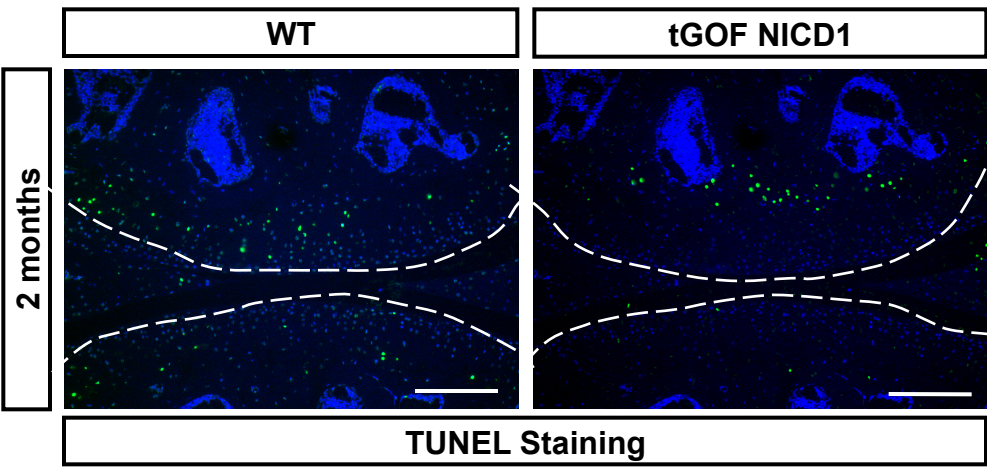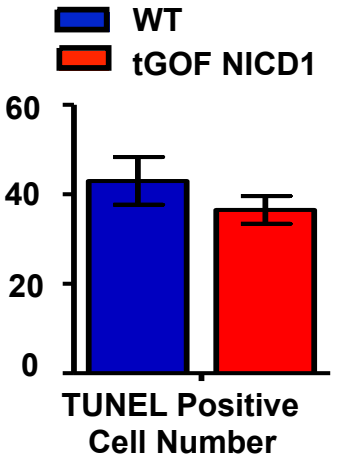

C

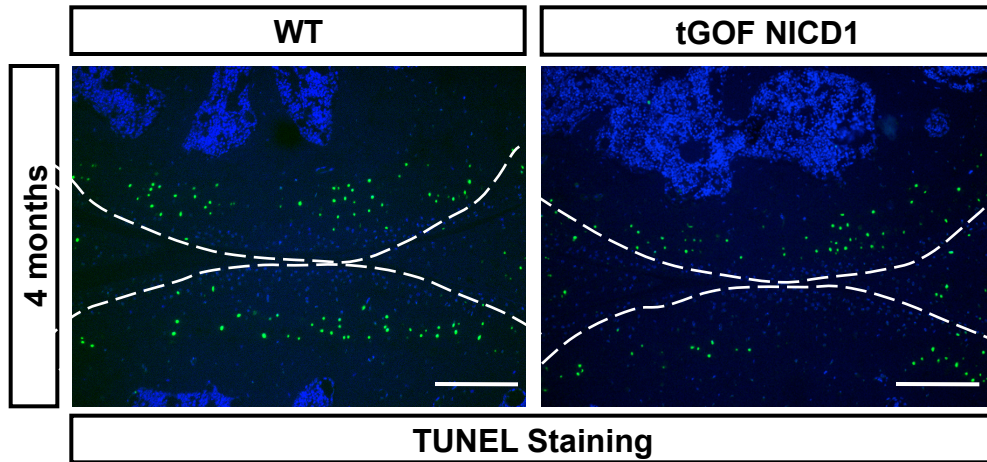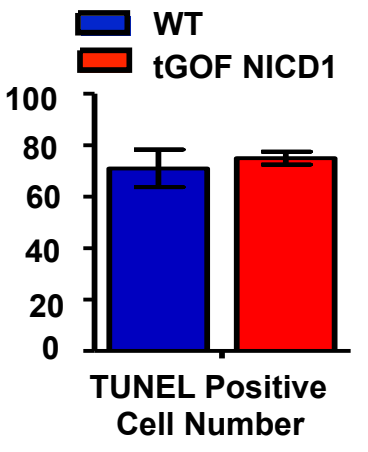

Supplement: NIHMS728654-supplement-Fig_S2.pdf [file NIHMS728654-supplement-Fig_S2.pdf]

# Supplemental Figure 3

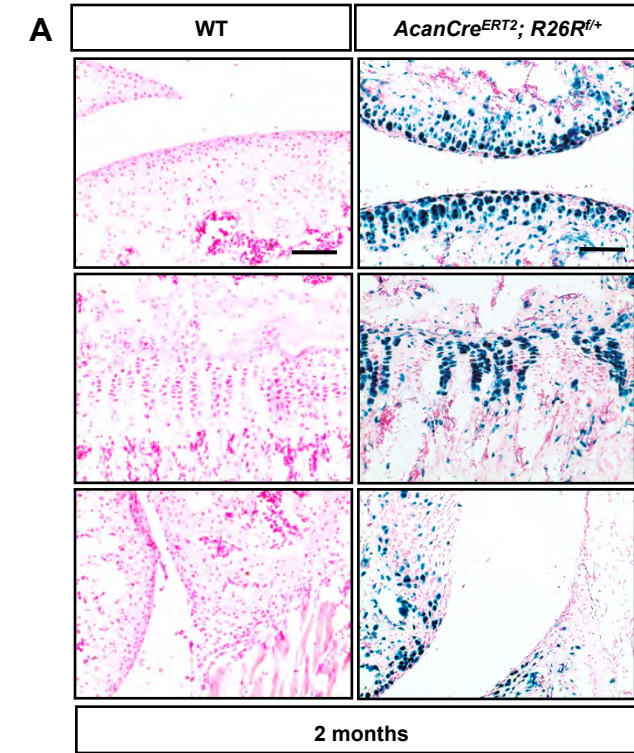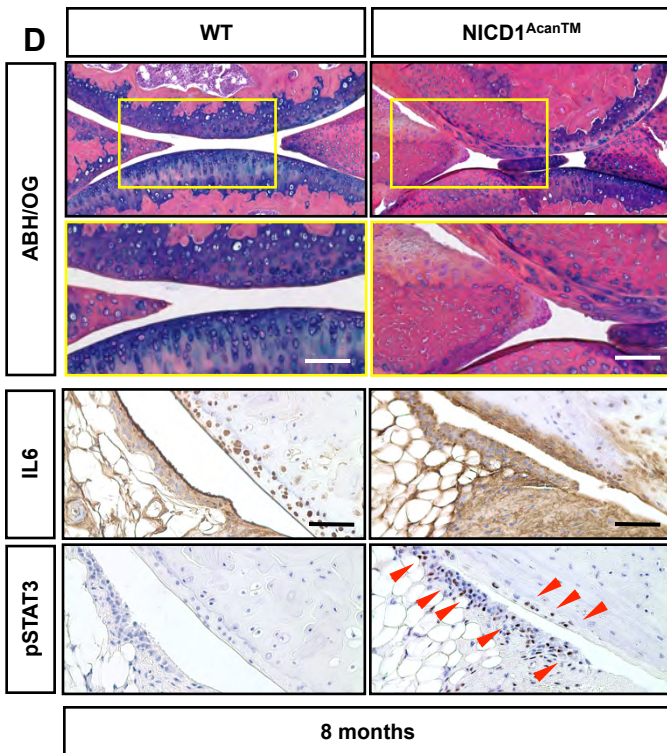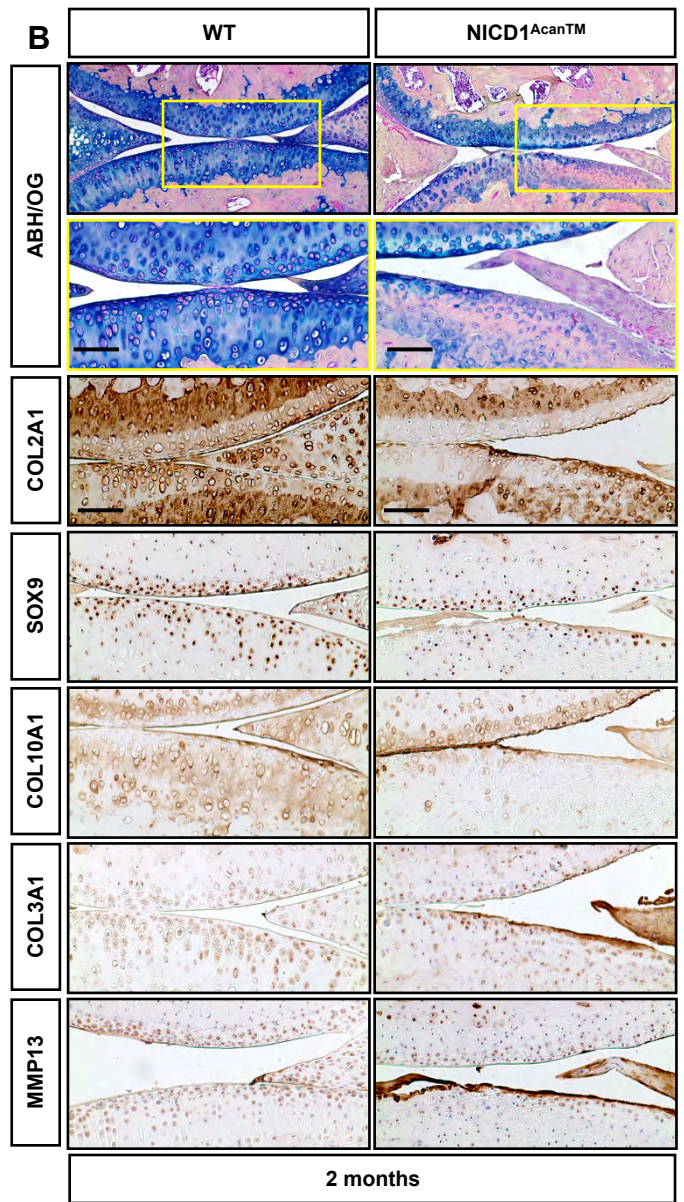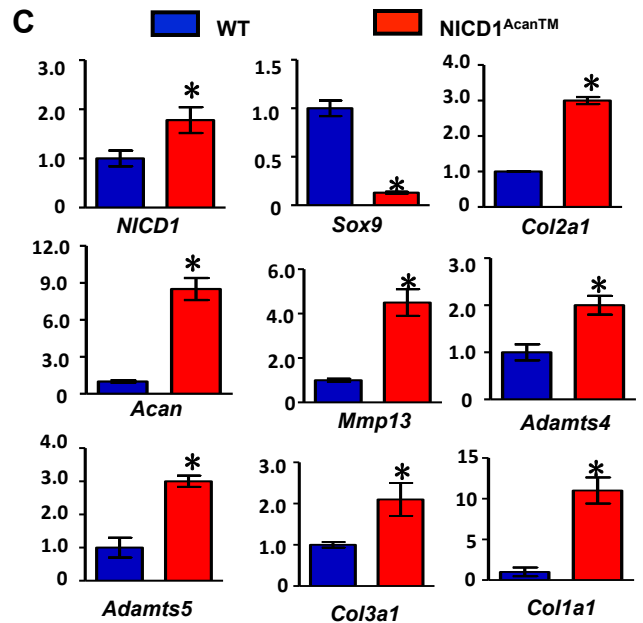

Supplement: NIHMS728654-supplement-Fig_S3.pdf [file NIHMS728654-supplement-Fig_S3.pdf]

# Supplemental Figure 4

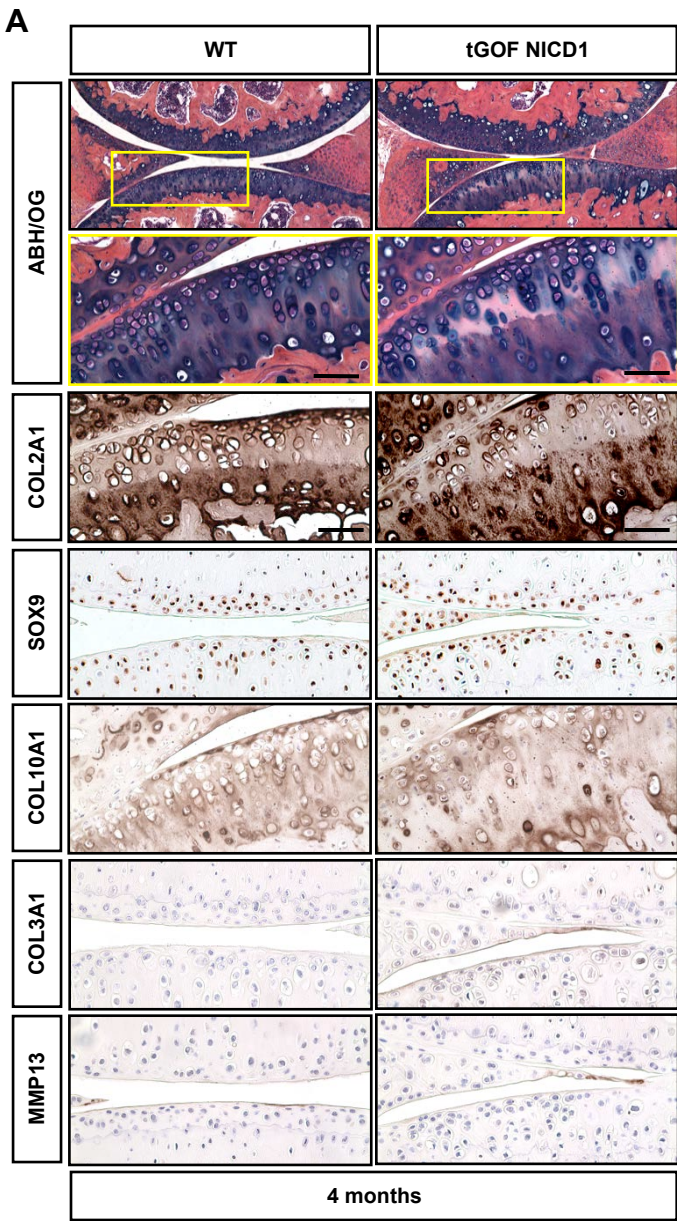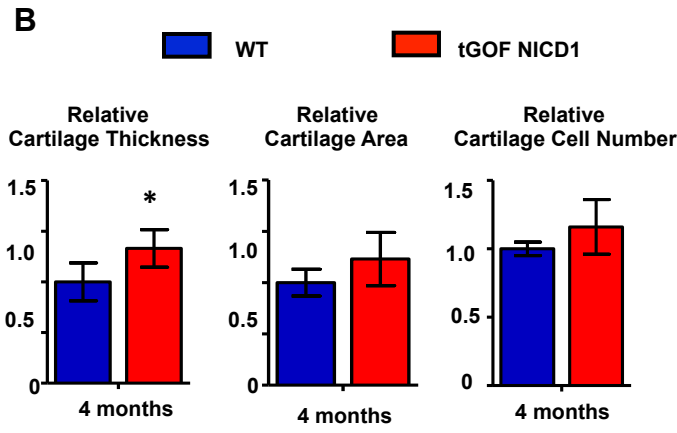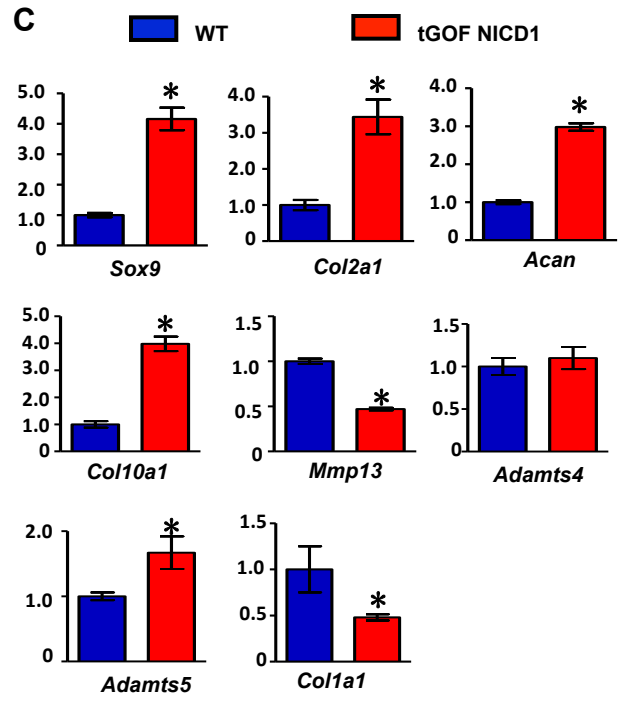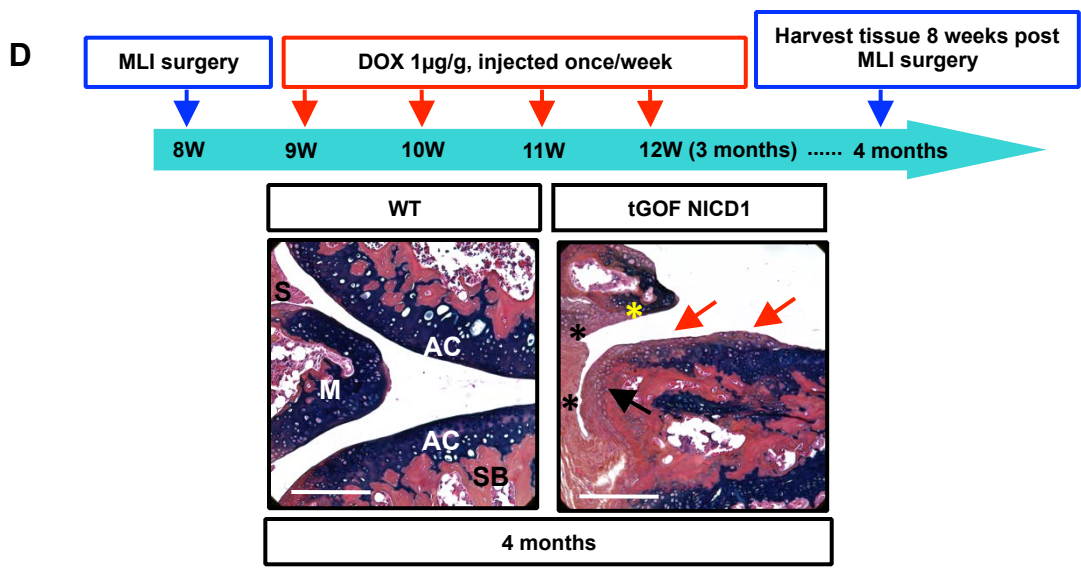

Supplement: NIHMS728654-supplement-Fig_S4.pdf [file NIHMS728654-supplement-Fig_S4.pdf]

Supplemental Figure 5

■ AdGFP  
■ AdCre  
■ AdCre + Genistein

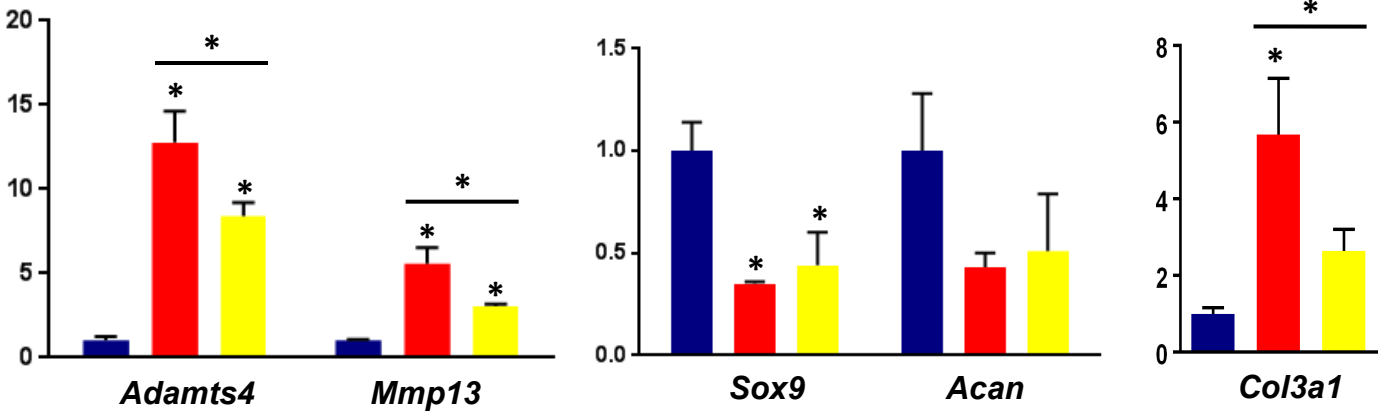

Supplement: NIHMS728654-supplement-Fig_S5.pdf [file NIHMS728654-supplement-Fig_S5.pdf]

**Supplemental Figure 6**

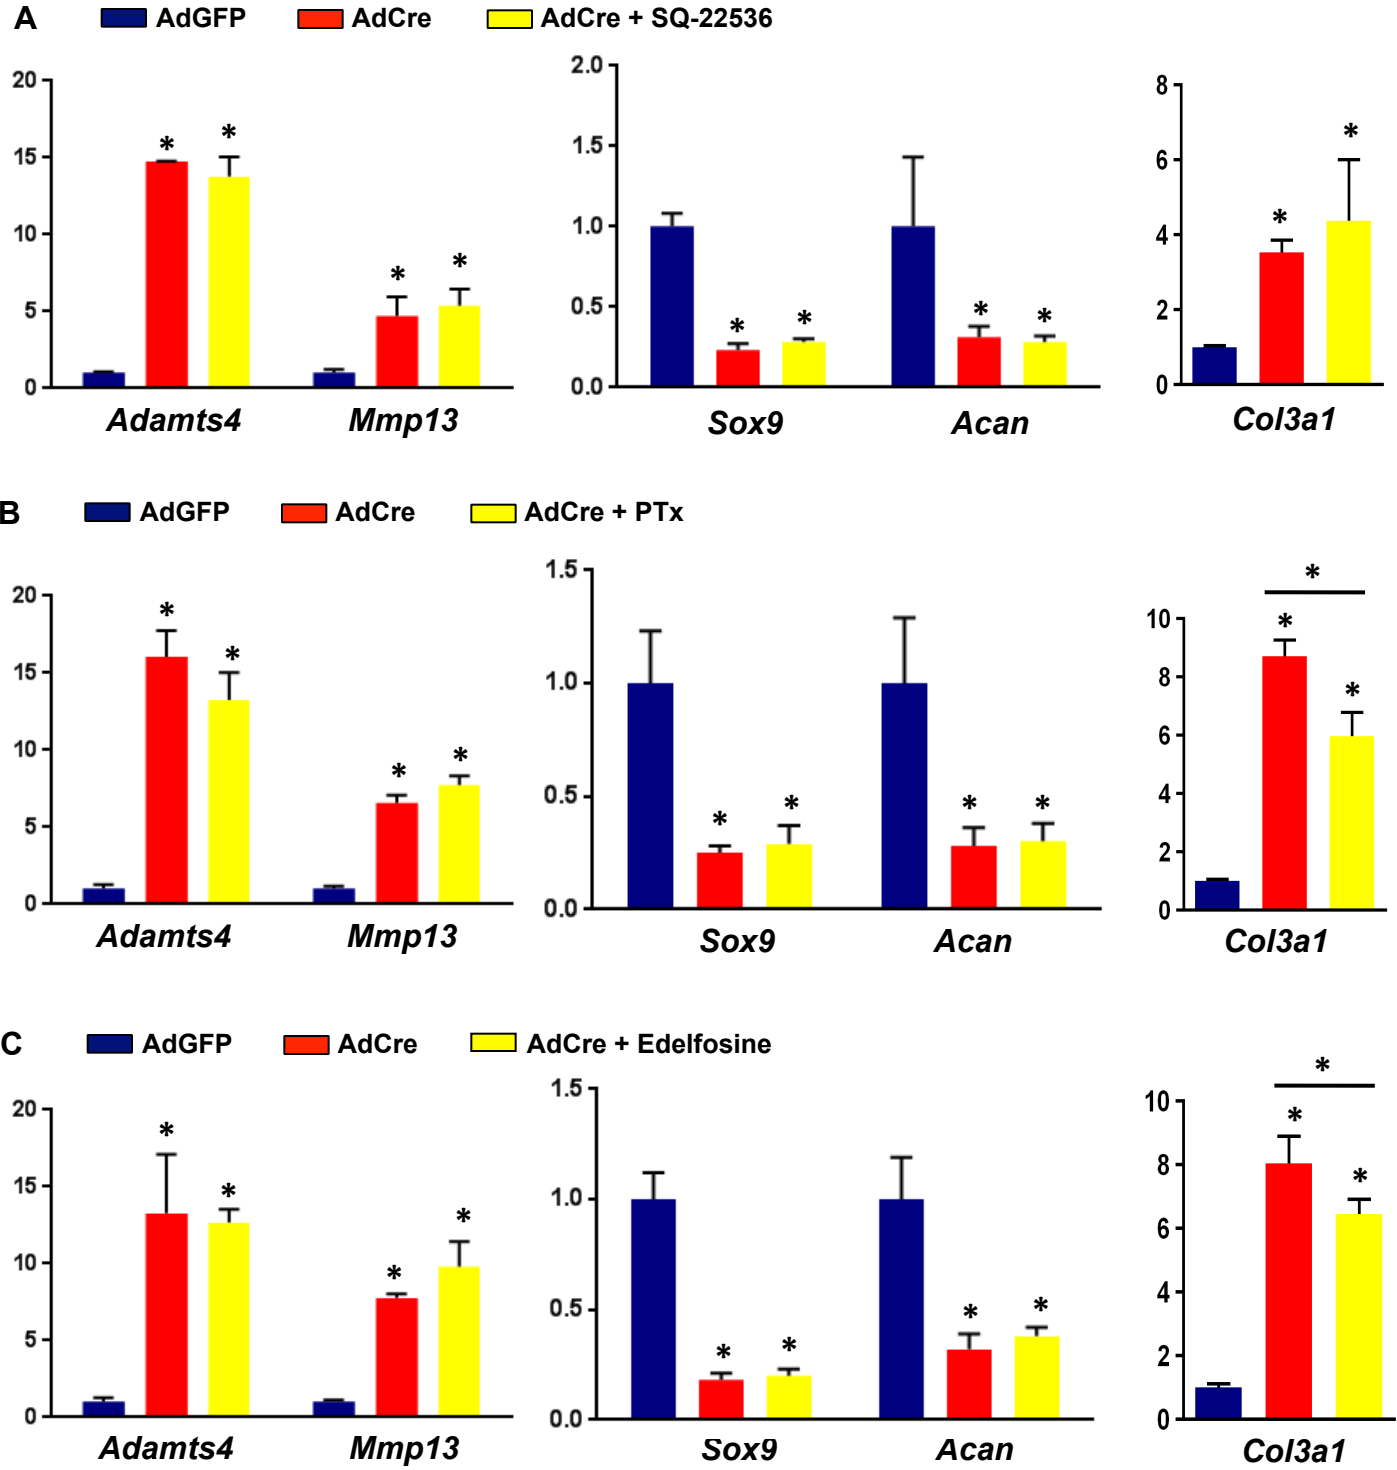

Supplement: NIHMS728654-supplement-Fig_S6.pdf [file NIHMS728654-supplement-Fig_S6.pdf]

# Supplemental Figure 7

**A**    AdGFP    AdCre    AdCre + BQ-123

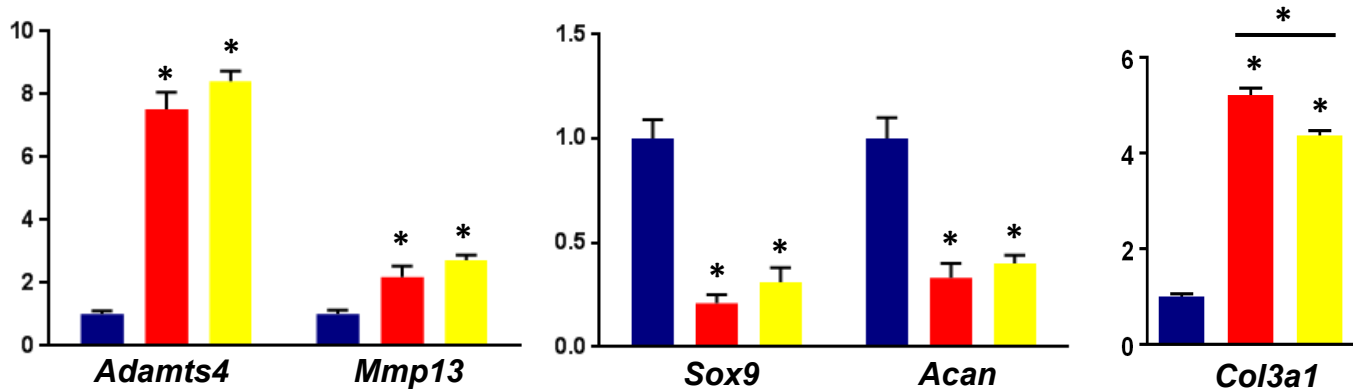

**B**    AdGFP    AdCre    AdCre + ODQ

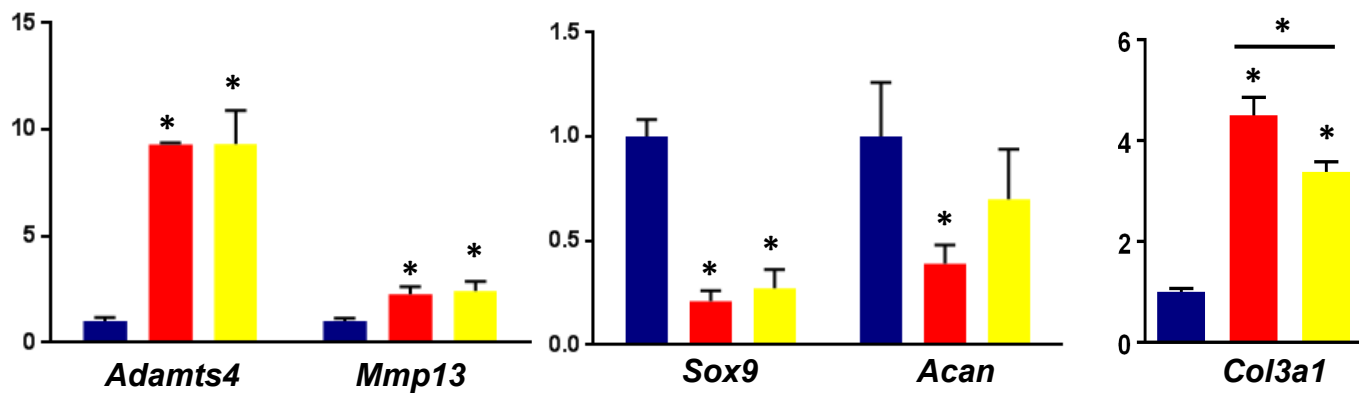

**C**    AdGFP    AdCre    AdCre + IBMX

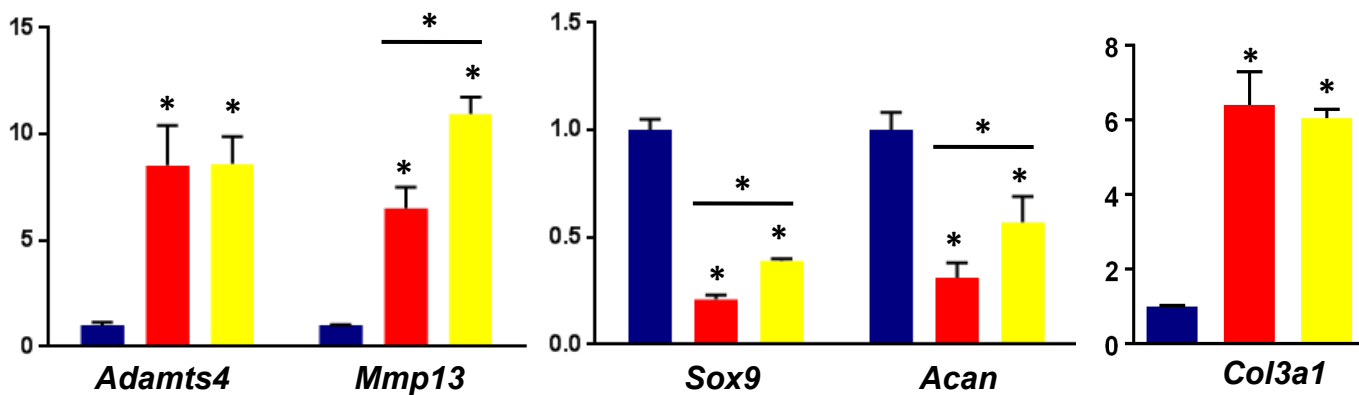

Supplement: NIHMS728654-supplement-Fig_S7.pdf [file NIHMS728654-supplement-Fig_S7.pdf]
